# Supplementary material
Source: Springer Nature journal article supplement (https://www.springermedizin.de/resource/supplementary/13054_2012_648_MOESM3_ESM.pdf/9708942)
Supplement: MOESM3 [file 9708942]

% CD4

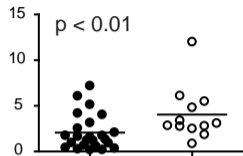

% CD8

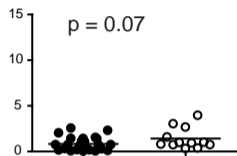

% NKT

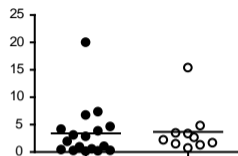

% NK

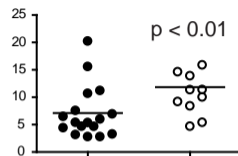

% CD8+ NK

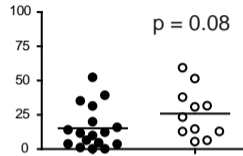

% pDC

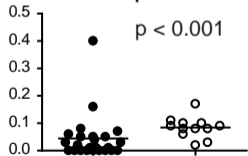

% mDC

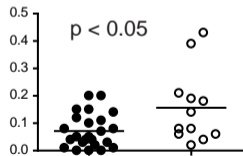

% CD4/CD25+

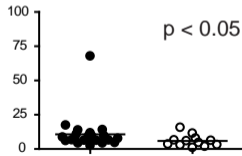

% CD11b+ MDSC

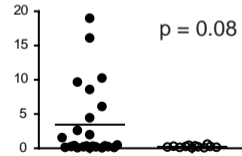

% Treg

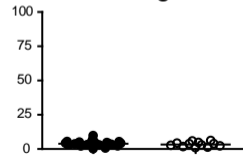

septic

control

septic

control

septic

control

septic

control

septic

control
